# Supplementary material
Source: PubMed Central journal article supplement (PMC3638029)
Supplement: NIHMS452015-supplement-Suppl_data_file.pdf [file NIHMS452015-supplement-Suppl_data_file.pdf]

**Figure S1:**

SRII<sub>k</sub> minus SRII difference spectra of the wild type (a), T204A (b), T204S (c), T204C (d), Y174F (e), T79A (f) and N105D (g), and BR<sub>k</sub> minus BR difference spectra of the wild type (h) and BR-T (i) in the 1790-810 cm<sup>-1</sup> region. The chromophore molecule is the unlabeled (Left) and C<sub>14</sub>-D labeled (Right) retinal. One division of the y-axis corresponds to 0.01 absorbance unit.

(Left) Vertical amplitudes are normalized by the bands of Asn105 at 1704 (-)/1700(+) cm<sup>-1</sup> for (a)-(f), while those in (g)-(i) were normalized to the wild type SRII (a) by the C-C stretch at 1204 (-) cm<sup>-1</sup>.

(Right) Vertical amplitudes are normalized by the bands of Asn105 at 1704 (-)/1700 (+) cm<sup>-1</sup> for (a)-(f). On the other hand, spectral comparison of the C<sub>14</sub>-D labeled retinal is not as simple for N105D SRII (g), BR (h) and BR-T (i). We normalized these spectra to those of unlabeled retinal (Left) by use of the band of Asp105 at 1743 (-)/1738(+) cm<sup>-1</sup> (g), amide I band at 1639 (-)/1623 (+) cm<sup>-1</sup> (h) and amide I band at 1640 (-)/1623 (+) cm<sup>-1</sup> (i).

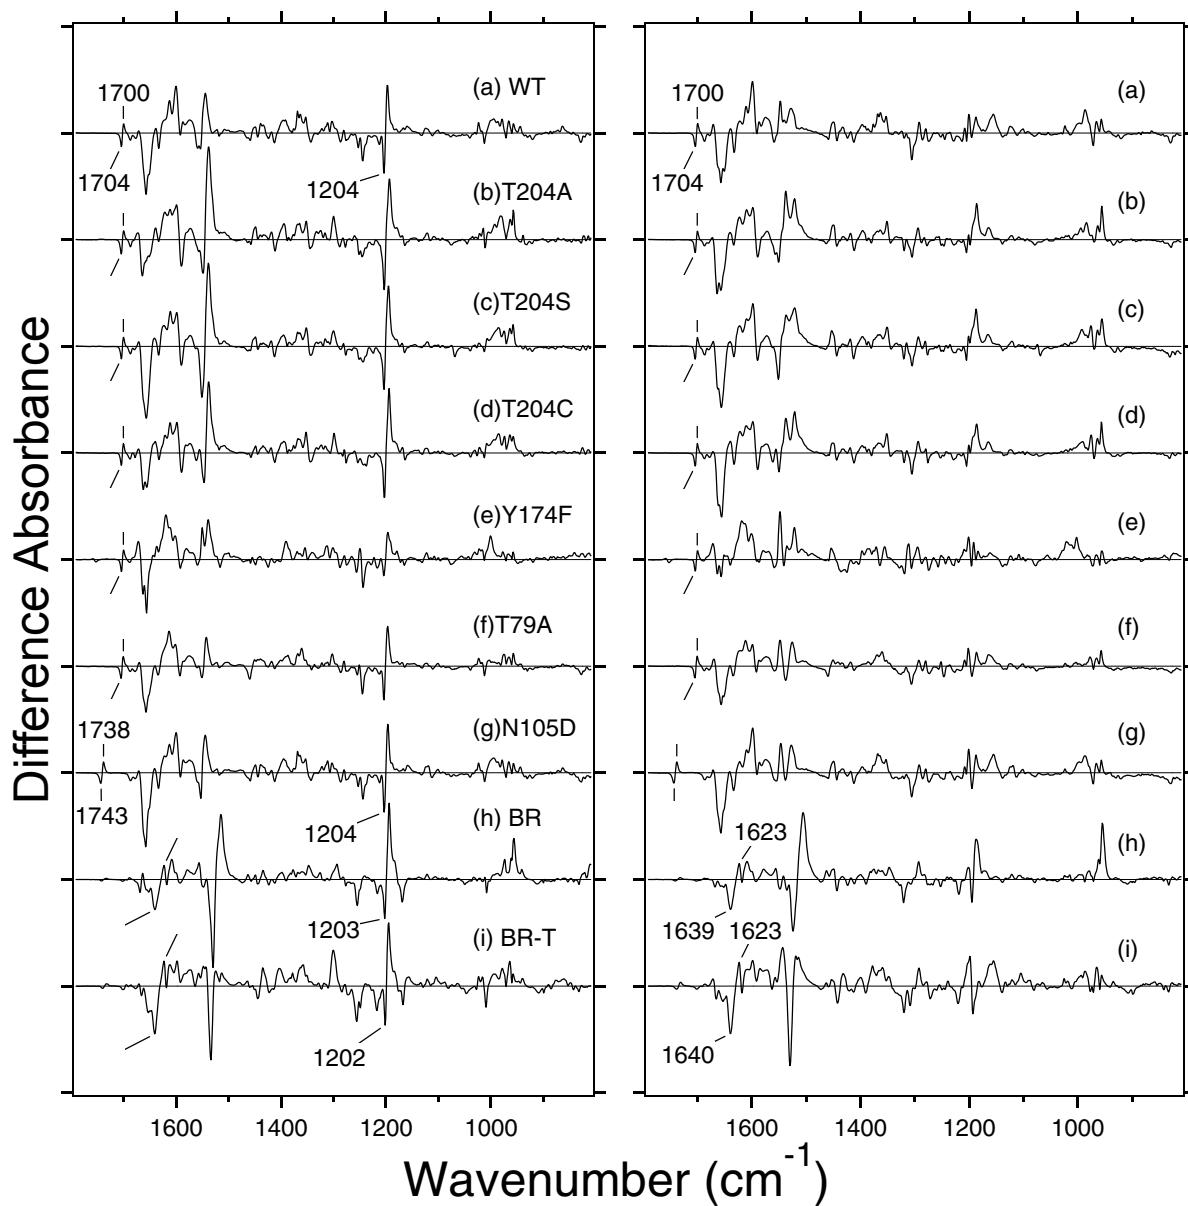

Figure S1.  
Ito et al.
